# Supplementary material for: A Literature Review of Changes in Phase II Drug-Metabolizing Enzyme and Drug Transporter Expression during Pregnancy
Source: Pharmaceutics. 2023 Nov 15;15(11):2624. doi: 10.3390/pharmaceutics15112624 (PMC10674389; doi:10.3390/pharmaceutics15112624)
Supplement: Supplementary file 1 [file pharmaceutics-15-02624-s001.zip › SupplementaryMaterialS1.xlsx]

## Sheet: Table S1
Family	Transporter or Enzyme	Function of Transporter or Enzyme	Pharmaceutical Molecule(s) Studied in Relation to Pregnancy	Interaction with Transporter or Enzyme	Interaction in Placenta or in Pregnant Woman?	Citation
Methyltransferase	Carboxyl-O-methyltransferase (CMT)	Transfers a methyl group from an S-adenosyl-L-methionine donor to aspartyl residues on the substrate [1] May affect the homeostasis of hormones [1]	NA	NA	NA	[1]
Methyltransferase	Catechol-O-methyltransferase (COMT)	Converts catecholamines and catechol estrogens to methyl ethers via O-methylation [2] Contributes to placental and embryonic development [2, 3]	NA	NA	NA	[2, 3]
Glutathione S-transferase	Glutathione S-transferase α (GSTA)	Catalyzes the conjugation of glutathione to electrophiles [5, 16] Detoxifies xenobiotics to protect the embryo during organogenesis [5, 17] Bioactivates xenobiotics [5]	NA	NA	NA	[5, 16, 17]
Glutathione S-transferase	Glutathione S-transferase μ (GST-μ)	Catalyzes the conjugation of glutathione to electrophiles [5, 16] Detoxifies xenobiotics to protect the embryo during organogenesis [5, 17] Bioactivates xenobiotics [5]	NA	NA	NA	[5, 16, 17]
Glutathione S-transferase	Glutathione S-transferase π (GST-π)	Catalyzes the conjugation of glutathione to electrophiles [5, 16] Detoxifies xenobiotics to protect the embryo during organogenesis [5, 17] Bioactivates xenobiotics [5] Transports bilirubin across the placenta [15]	Amitriptyline	Inhibitor [11]	Placenta	[5, 10-13, 15-17]
			Clomipramine	Inhibitor [11]	Placenta
			Fluoxetine	Inhibitor [10]	Placenta
			Hypericin	Inhibitor [13]	Placenta
			Sertraline	Inhibitor [12]	Placenta
N-acetyltransferase	N-acetyltransferase 1 (NAT1)	Catalyzes the N-acetylation of primary arylamines and hydrazines [20, 21] Provides a major contribution to placental acetylation capacity [20, 21]	NA	NA	NA	[20, 21]
N-acetyltransferase	N-acetyltransferase 2 (NAT2)	Catalyzes the N-acetylation of primary arylamines and hydrazines [20, 21] Provides a minor contribution to placental acetylation capacity [20, 21]	Caffeine	Substrate [23]	Pregnant woman	[20-23]
			Hydralazine	Substrate [22]	Pregnant woman
Sulfotransferase	Sulfotransferase 1E1 (SULT1E1)	Catalyzes the sulfation of estrogens to regulate intracellular steroid concentrations [24]	NA	NA	NA	[24, 25]
UDP-glucuronosyltransferase 1	UDP-glucuronosyltransferase 1A1 (UGT1A1)	Catalyzes the addition of glucuronic acid to substrates, allowing for increased aqueous solubility and urinary excretion [27, 29]	Buprenorphine	Substrate [26]	Pregnant woman	[26, 27, 29]
UDP-glucuronosyltransferase 1	UDP-glucuronosyltransferase 1A3 (UGT1A3)	Catalyzes the addition of glucuronic acid to substrates, allowing for increased aqueous solubility and urinary excretion [27, 29]	Buprenorphine	Substrate [26]	Pregnant woman	[26, 27, 29]
UDP-glucuronosyltransferase 1	UDP-glucuronosyltransferase 1A4 (UGT1A4)	Catalyzes the addition of glucuronic acid to substrates, allowing for increased aqueous solubility and urinary excretion [27, 29]	Lamotrigine	Substrate [27, 28]	Placenta [27] Pregnant woman [28]	[27-29]
UDP-glucuronosyltransferase 2	UDP-glucuronosyltransferase 2B4 (UGT2B4)	Catalyzes the addition of glucuronic acid to substrates, allowing for increased aqueous solubility and urinary excretion [27, 29] Participates in the metabolism of steroid substrates and bile acids [29]	NA	NA	NA	[27, 29]
UDP-glucuronosyltransferase 2	UDP-glucuronosyltransferase 2B7 (UGT2B7)	Catalyzes the addition of glucuronic acid to substrates, allowing for increased aqueous solubility and urinary excretion [27, 29] Participates in the metabolism of steroid substrates, thyroid hormones, and bile acids [29]	Buprenorphine	Substrate [26]	Pregnant woman	[26, 27, 29]
UDP-glucuronosyltransferase 2	UDP-glucuronosyltransferase 2B10 (UGT2B10)	Catalyzes the addition of glucuronic acid to substrates, allowing for increased aqueous solubility and urinary excretion [27, 29]	NA	NA	NA	[27, 29]
UDP-glucuronosyltransferase 2	UDP-glucuronosyltransferase 2B11 (UGT2B11)	Catalyzes the addition of glucuronic acid to substrates, allowing for increased aqueous solubility and urinary excretion [27, 29]	NA	NA	NA	[27, 29]
UDP-glucuronosyltransferase 2	UDP-glucuronosyltransferase 2B15 (UGT2B15)	Catalyzes the addition of glucuronic acid to substrates, allowing for increased aqueous solubility and urinary excretion [27, 29] Participates in the metabolism of steroid substrates [29]	NA	NA	NA	[27, 29]
ABCB (multidrug resistance)	P-glycoprotein (P-gp, MDR1, ABCB1)	Effluxes xenobiotics from the fetal circulation [49, 51] Prevents the transfer of maternal glucocorticoids to the fetal circulation [50, 60] Maintains the cytotrophoblast and extravillous trophoblast cell lineages during placental development [66]	Digoxin	Substrate [37, 42, 45, 51]	Placenta [37, 45, 51] Pregnant woman [42]	[30-51, 60-62, 65, 66, 72, 88, 98, 136]
			Quinidine	Inhibitor [45]	Placenta
			Verapamil	Inhibitor? [43-45]	Placenta
			Bupropion	Substrate [40]	Placenta
			Fluoxetine	Inhibitor? [38]	Placenta
			Glyburide	Minimal [43] Inhibitor [72]	Placenta
			Metformin	Substrate [43]	Placenta
			Rosiglitazone	Substrate [43]	Placenta
			Fexofenadine	Substrate [38, 88]	Placenta [38] Pregnant woman [88]
			Pravastatin	Substrate [33]	Placenta
			Sulpiride	Substrate [31]	Placenta
			Abacavir	Substrate [34]	Placenta
			Atazanavir	Inducer [65]	Placenta
			Entecavir	Substrate [32, 136]	Placenta
			Indinavir	Substrate [36]	Placenta
			Lopinavir	Inducer [65]	Placenta
			Maraviroc	Substrate? [30, 47]	Placenta
			Ritonavir	Inducer [65]	Placenta
			Saquinavir	Substrate [48, 49]	Placenta
			Tenofovir disoproxil fumarate	Substrate [46]	Placenta
			Quetiapine	Minimal [39]	Placenta
			Paclitaxel	Substrate [41, 44]	Placenta
			Vinblastine	Substrate [36, 37, 51]	Placenta
			Vincristine	Substrate [35, 37]	Placenta
			Dexamethasone	Inducer [61, 62]	Placenta
			Buprenorphine	Inhibitor [44]	Placenta
			Methadone	Substrate [44]	Placenta
			Morphine	Substrate [44]	Placenta
			Nicotine	Inhibitor [98]	Placenta
ABCB (multidrug resistance)	Multidrug resistance protein 3 (MDR3, ABCB4)	Translocates phosphatidylcholine across the plasma membrane, from the inner leaflet to the outer leaflet [92]	NA	NA	NA	[92]
ABCB (multidrug resistance)	Bile salt export pump (BSEP, ABCB11)	Transports bile acids [95] Eliminates toxic compounds from the fetal circulation, preventing accumulation in the fetal liver [94]	NA	NA	NA	[94, 95]
ABCC (multidrug resistance associated protein)	Multidrug resistance associated protein 1 (MRP1, ABCC1)	Transports substrates to the fetal circulation [64]	Glyburide	Substrate? [43, 96]	Placenta	[30, 43, 64, 65, 68, 96, 98]
			Atazanavir	Inducer [65]	Placenta
			Lopinavir	Inhibitor [65]	Placenta
			Emtricitabine	Substrate [68]	Placenta
			Ritonavir	Inhibitor [65]	Placenta
			Maraviroc	Substrate [30]	Placenta
			Nicotine	Inducer [98]	Placenta
ABCC (multidrug resistance associated protein)	Multidrug resistance associated protein 2 (MRP2, ABCC2)	Transports sulfate, glucuronate, and glutathione metabolites from the fetal circulation, eliminating fetal wastes and protecting the fetus from exogenous compounds [100]	Glyburide	Substrate? [96]	Placenta	[47, 68, 96, 99, 100]
			Emtricitabine	Substrate [68]	Placenta
			Maraviroc	Substrate? [47]	Placenta
			Talinolol	Substrate [99]	Placenta
ABCC (multidrug resistance associated protein)	Multidrug resistance associated protein 3 (MRP3, ABCC3)	Transports glucuronidated bile acids [102] Eliminates anionic substrates from the fetal circulation [72, 98]	Indomethacin	Inhibitor [72]	Placenta	[68, 72, 96, 98, 102]
			Glyburide	Substrate? [72, 96]	Placenta
			Emtricitabine	Substrate [68]	Placenta
			Nicotine	Inducer [98]	Placenta
ABCC (multidrug resistance associated protein)	Multidrug resistance associated protein 4 (MRP4, ABCC4)	Transports substrates from the fetal circulation [65] Participates in embryo implantation by inducing cell differentiation and regulating the Wnt/β-catenin pathway [103]	NA	NA	NA	[65, 103]
ABCC (multidrug resistance associated protein)	Multidrug resistance associated protein 5 (MRP5, ABCC5)	Exports cyclic nucleotides, including endogenous nucleoside monophosphates, exogenous nucleoside analogs, and anionic compounds [104]	NA	NA	NA	[104]
ABCC (multidrug resistance associated protein)	Multidrug resistance associated protein 7 (MRP7, ABCC10)	NA	Maraviroc	Substrate? [47]	Placenta	[47, 106]
			Paclitaxel	Inhibitor [106]	Placenta
ABCC (multidrug resistance associated protein)	Multidrug resistance associated protein 8 (MRP8, ABCC11)	NA	Maraviroc	Substrate? [47]	Placenta	[47]
ABCG (multidrug resistance)	Breast cancer resistance protein (BCRP, ABCG2)	Effluxes xenobiotics [70], sulfated steroids [77], and sulfated or nonsulfated bile acids [79] from the fetal circulation Protects trophoblast cells from apoptotic signals, such as exogenous ceramides [90]	Acetaminophen	Inhibitor [75]	Placenta	[31-34, 40, 43, 46, 61, 68-79, 83, 88, 90, 136]
			Levofloxacin	Substrate [83]	Placenta
			Nitrofurantoin	Substrate [69]	Placenta
			Novobiocin	Inhibitor [70, 72]	Placenta
			Bupropion	Substrate [40]	Placenta
			Glyburide	Substrate [43, 70-73, 78] Inhibitor [72, 78]	Placenta
			Metformin	Substrate [43]	Placenta
			Omeprazole	Inhibitor [83]	Placenta
			Pravastatin	Substrate [33]	Placenta
			Rosuvastatin	Substrate [88]	Pregnant woman
			Nicardipine	Inhibitor [71]	Placenta
			Sulpiride	Substrate [31]	Placenta
			Abacavir	Substrate [34]	Placenta
			Emtricitabine	Substrate [68]	Placenta
			Entecavir	Substrate [32, 136]	Placenta
			Tenofovir disoproxil fumarate	Substrate [46]	Placenta
			Dexamethasone	Inducer [61]	Placenta
			Cannabidiol	Inhibitor [76]	Placenta
			Buprenorphine	Inducer [74]	Placenta
			Norbuprenorphine	Inducer [74]	Placenta
			Methadone	Inducer [74]	Placenta
SLC10A	Sodium-taurocholate cotransporting polypeptide (NTCP, SLC10A1)	NA	Paclitaxel	Inhibitor [106]	Placenta	[106]
SLC16A	Monocarboxylate transporter 3 (MCT3, SLC16A3)	NA	Paclitaxel	Inhibitor [106]	Placenta	[106]
SLC21A/SLCO (organic anion transporting polypeptide)	Organic anion transporting polypeptide 1A2 (OATP1A2, OATP-A, SLC21A3, SLCO1A2)	Effluxes bile acids to prevent accumulation in the fetal circulation [92, 108] Influxes substrates to the fetal circulation [107]	Pravastatin	Substrate [107]	Placenta	[30, 92, 107, 108]
			Maraviroc	Substrate [30] Inhibitor [30]	Placenta
			Ritonavir	Inhibitor [30]	Placenta
			Sulfasalazine	Inhibitor [30]	Placenta
SLC21A/SLCO (organic anion transporting polypeptide)	Organic anion transporting polypeptide 1B1 (OATP1B1, OATP-C, SLC21A6, SLCO1B1)	Transports bile acids [92]	Rosuvastatin	Substrate [88]	Pregnant woman	[88, 92]
SLC21A/SLCO (organic anion transporting polypeptide)	Organic anion transporting polypeptide 1B3 (OATP1B3, OATP-8, SLC21A8, SLCO1B3)	Effluxes bile acids to prevent accumulation in the fetal circulation [108] May transport substrates to the fetal circulation [108]	Maraviroc	Substrate [30] Inducer [30]	Placenta	[30, 108]
			Ritonavir	Inhibitor [30]	Placenta
			Sulfasalazine	Inhibitor [30]	Placenta
SLC21A/SLCO (organic anion transporting polypeptide)	Organic anion transporting polypeptide 2A1 (OATP2A1, PGT, SLCO2A1)	Influxes substrates to the fetal circulation [107]	Pravastatin	Substrate [107]	Placenta	[107]
			Diclofenac	Inhibitor [107]	Placenta
SLC21A/SLCO (organic anion transporting polypeptide)	Organic anion transporting polypeptide 2B1 (OATP2B1, OATP-B, SLC21A9, SLCO2B1)	Uptakes anionic substrates [109] and sulfated steroids [81, 98] to the fetal circulation [38]	Rifampin	Substrate? [109]	Placenta	[38, 81, 98, 109, 110]
			Glyburide	Substrate? [109, 110]	Placenta
			Fexofenadine	Substrate [38]	Placenta
			Atorvastatin	Substrate? [109]	Placenta
SLC21A/SLCO (organic anion transporting polypeptide)	Organic anion transporting polypeptide 3A1 (OATP3A1, OATP-D, SLC21A11, SLCO3A1)	NA	Paclitaxel	Inhibitor [106]	Placenta	[106]
SLC21A/SLCO (organic anion transporting polypeptide)	Organic anion transporting polypeptide 4A1 (OATP4A1, OATP-E, SLC21A12, SLCO4A1)	NA	Lopinavir	Inhibitor [65]	Placenta	[65]
			Ritonavir	Inhibitor [65]	Placenta
SLC22A: organic cation transporter subfamily	Organic cation transporter 1 (OCT1, SLC22A1)	Facilitates the bidirectional transport of cationic and neutral compounds [111, 114] May facilitate transport of acetylcholine from the placenta [112]	NA	NA	NA	[111, 112, 114]
SLC22A: organic cation transporter subfamily	Organic cation transporter 2 (OCT2, SLC22A2)	Facilitates the bidirectional transport of cationic and neutral compounds [111, 114]	Metformin	Substrate [113]	Pregnant woman	[111, 113, 114]
			N1-methylnicotinamide	Substrate [113]	Pregnant woman
SLC22A: organic cation transporter subfamily	Organic cation transporter 3 (OCT3, SLC22A3)	Facilitates the bidirectional transport of cationic and neutral compounds [111, 114, 117] May facilitate transport of acetylcholine from the placenta [112]	Procainamide	Inhibitor [117]	Placenta	[31, 32, 111, 112, 114, 117]
			Quinidine	Inhibitor [117]	Placenta
			Trimethoprim	Inhibitor [117]	Placenta
			Imipramine	Inhibitor [117]	Placenta
			Cimetidine	Inhibitor [117]	Placenta
			Ranitidine	Inhibitor [117]	Placenta
			Verapamil	Inhibitor [117]	Placenta
			Sulpiride	Substrate [31]	Placenta
			Entecavir	Substrate [32]	Placenta
			Quinine	Inhibitor [117]	Placenta
SLC22A family: organic cation/carnitine transporter subfamily	Organic cation/carnitine transporter 1 (OCTN1, SLC22A4)	Transports carnitine, zwitterionic compounds, and cationic compounds [111]	Emtricitabine	Substrate [68]	Placenta	[31, 68, 111]
			Sulpiride	Substrate [31]	Placenta
SLC22A family: organic cation/carnitine transporter subfamily	Organic cation/carnitine transporter 2 (OCTN2, SLC22A5)	Transports carnitine, zwitterionic compounds, and cationic compounds to the fetal circulation [111, 120, 121]	Amphetamine	Inhibitor [120]	Placenta	[31, 32, 111, 118-121]
			Ephedrine	Inhibitor [120]	Placenta
			Methamphetamine	Inhibitor [120]	Placenta
			Ciprofloxacin	Inhibitor [121]	Placenta
			Gatifloxacin	Inhibitor [121]	Placenta
			Grepafloxacin	Inhibitor [121]	Placenta
			Levofloxacin	Inhibitor [121]	Placenta
			Ofloxacin	Inhibitor [121]	Placenta
			Quinidine	Inhibitor [118]	Placenta
			Gabapentin	Inhibitor [118]	Placenta
			Phenytoin	Inhibitor [118]	Placenta
			Tiagabine	Substrate [118] Inhibitor [118]	Placenta
			Topiramate	Inhibitor [118]	Placenta
			Valproic acid	Inhibitor [118]	Placenta
			Vigabatrin	Inhibitor [118]	Placenta
			Verapamil	Inhibitor [118, 119]	Placenta
			Sulpiride	Substrate [31]	Placenta
			Entecavir	Substrate [32]	Placenta
			Quinine	Inhibitor [118]	Placenta
SLC22A family: organic anion transporter subfamily	Organic anion transporter 1 (OAT1, SLC22A6)	NA	Tenofovir	Substrate [122]	Pregnant woman	[122]
SLC22A family: organic anion transporter subfamily	Organic anion transporter 2 (OAT2, SLC22A7)	Influxes nucleosides [123]	Acyclovir	Substrate [122]	Pregnant woman	[122, 123]
			Entecavir	Substrate [123]	Pregnant woman
SLC22A family: organic anion transporter subfamily	Organic anion transporter 3 (OAT3, SLC22A8)	NA	Oseltamavir carboxylate	Substrate [122]	Pregnant woman	[122]
SLC22A family: organic anion transporter subfamily	Organic anion transporter 4 (OAT4, SLC22A11)	Transports anionic substrates to and from the fetal circulation [107, 125] Mediates estrogen biosynthesis in the placenta [127]	Probenecid	Inhibitor [125]	Placenta	[65, 107, 124, 125, 127]
			Pravastatin	Substrate [107]	Placenta
			Bumetanide	Inhibitor [125]	Placenta
			Furosemide	Inhibitor [125]	Placenta
			Olmesartan	Substrate [124]	Placenta
			Atazanavir	Inhibitor [65]	Placenta
			Lopinavir	Inhibitor [65]	Placenta
			Ritonavir	Inhibitor [65]	Placenta
			Diclofenac	Inhibitor [125]	Placenta
			Indomethacin	Inhibitor [125]	Placenta
SLC28A family (concentrative nucleoside transporter)	Concentrative nucleoside transporter 1 (CNT1, SLC28A1)	Uptakes pyrimidine nucleosides [68]	Emtricitabine	Substrate [68]	Placenta	[68]
SLC28A family (concentrative nucleoside transporter)	Concentrative nucleoside transporter 2 (CNT2, SLC28A2)	Uptakes purine nucleosides [68]	Entecavir	Substrate [32]	Placenta	[32, 68, 128]
			Valproic acid	Inducer [128]	Placenta
			5-Azacytidine	Inducer [128]	Placenta
SLC28A family (concentrative nucleoside transporter)	Concentrative nucleoside transporter 3 (CNT3, SLC28A3)	Uptakes purine and pyrimidine nucleosides [68]	Entecavir	Substrate [32]	Placenta	[32, 68, 106]
			Paclitaxel	Inhibitor [106]	Placenta
SLC29A family (equilibrative nucleoside transporter)	Equilibrative nucleoside transporter 1 (ENT1, SLC29A1)	Influxes purine and pyrimidine nucleosides [133, 134]	Abacavir	Substrate [131]	Placenta	[32, 68, 123, 130-134]
			Emtricitabine	Substrate [68]	Placenta
			Entecavir	Substrate [32, 123, 133]	Placenta [32, 133] Pregnant Woman [123]
			Ribavirin	Substrate [130, 132]	Placenta
			Dipyridamole	Inhibitor [130, 134]	Placenta
SLC29A family (equilibrative nucleoside transporter)	Equilibrative nucleoside transporter 2 (ENT2, SLC29A2)	Influxes purine and pyrimidine nucleosides [134]	Entecavir	Substrate [32, 136]	Placenta	[32, 106, 130, 134, 136]
			Dipyridamole	Inhibitor [130, 136]	Placenta
			Paclitaxel	Inhibitor [106]	Placenta
SLC29A family (equilibrative nucleoside transporter)	Equilibrative nucleoside transporter 4 (ENT4, SLC29A4)	NA	Nicotine	Inducer [98]	Placenta	[98]
SLC47A family (multidrug and toxin extrusion)	Multidrug and toxin extrusion 1 (MATE1, SLC47A1)	Participates in renal excretion of cationic compounds alongside OCT2 [113] May participate in placental efflux alongside OCT3 [114]	Metformin	Substrate [113]	Pregnant woman	[113, 114, 138]
			Lamivudine	Substrate [138]	Placenta
			N1-methylnicotinamide	Substrate [113]	Pregnant woman
SLC47A family (multidrug and toxin extrusion)	Multidrug and toxin extrusion 2 (MATE2, SLC47A2)	Participates in renal excretion of cationic compounds alongside OCT2 [113] May participate in placental efflux alongside OCT3 [114]	Metformin	Substrate [113]	Pregnant woman	[113, 114]
			N1-methylnicotinamide	Substrate [113]	Pregnant woman
Immunoglobulin transporter	Neonatal Fc receptor (FcRn)	Facilitates the transport of IgG into the cell (IgG1 > IgG4 > IgG3 = IgG2) [139, 141] Participates in the transcytosis of IgG [140]	NA	NA	NA	[139-141]

## Sheet: Table S2
			Effect of Gestational Age on Maternal Enzyme Activity/Expression								Effect of Pregnancy Complications on Maternal Enzyme Activity/Expression		Effect of Hormones on Maternal Enzyme Activity/Expression
Enzyme Family	Enzyme	Location	First Trimester (0-12 weeks)	Evidence of Effect	Second Trimester (13-28 weeks)	Evidence of Effect	Third Trimester (29-40 weeks) or Term	Evidence of Effect	Postpartum (~≥4 weeks postdelivery)	Evidence of Effect	Complication	Evidence of Effect	Endogenous Hormone	Evidence of Effect	Citation
Methyltransferase	Carboxyl-O-methyltransferase (CMT)	Ovary [1]	NA	NA	NA	NA	NA	NA	NA	NA	NA	NA	NA	NA	[1]
Methyltransferase	Catechol-O-methyltransferase (COMT)	NA	NA	NA	NA	NA	NA	NA	NA	NA	NA	NA	NA	NA	NA
Glutathione S-transferase	Glutathione S-transferase α (GSTA)	Liver [6-9] Decidua [14]	No change	There was no significant change observed regarding the mean plasma GSTA1-1 concentration in healthy pregnant women during preconception through the first trimester of pregnancy [6]	No change	Throughout the second trimester of pregnancy, there was no significant change observed regarding the mean plasma GSTA1-1 concentration in healthy pregnant women [6] No statistically significant difference in median plasma GSTA1-1 concentration was observed for normotensive pregnancies from the first trimester to and throughout the second trimester: 1.1 μg/L in gestational week 12, 1.0 μg/L in ges…	No change	Throughout the third trimester of pregnancy, there was no significant change observed regarding the mean plasma GSTA1-1 concentration in healthy pregnant women [6] No statistically significant difference in median plasma GSTA1-1 concentration was observed for normotensive pregnancies throughout the third trimester: 1.0 μg/L in gestational week 28 and 1.2 μg/L in gestational week 38 [7]	Increase	An approximate 2-fold increase in plasma GSTA1-1 concentration was observed 6 weeks postpartum compared to gestational week 30 [6]	Epilepsy, increase (protein)	At gestational week 4, a significantly higher mean GSTA1-1 plasma concentration was observed in epileptic pregnant women (1.68 μg/L) than in non-epileptic pregnant women taking anti-epileptic drugs (1.08 μg/L); no significant difference in GSTA1-1 plasma concentrations between the populations were observed in the second or third trimesters [6]	NA	NA	[6-9, 14]
											Intrahepatic cholestasis, increase (protein)	A higher mean plasma GSTA concentration (51.0 μg/L) was observed in pregnant women with intrahepatic cholestasis, which was approximately 50-fold higher than that (1.62 μg/L) observed in pregnant women with uncomplicated pregnancies [8] Serum GSTA concentrations were 400% higher in study participants with intrahepatic cholestasis compared to healthy participants, with a significant 6.2% weekly in…
											Preeclampsia, increase (protein)	Increased plasma GSTA1-1 and/or alanine aminotransferase levels were observed in 46% of study participants with preeclampsia, who also demonstrated a median 6.4-fold elevation in GSTA1-1 concentrations compared to the upper normal reference level [7]
Glutathione S-transferase	Glutathione S-transferase μ (GST-μ)	Decidua [14]	NA	NA	NA	NA	NA	NA	NA	NA	NA	NA	NA	NA	[14]
Glutathione S-transferase	Glutathione S-transferase π (GST-π)	Decidua [14]	NA	NA	NA	NA	NA	NA	NA	NA	Preeclampsia, decrease (protein)	Median decidual GST-π protein levels were decreased in preeclamptic pregnant women (1268 ng/mg) compared to normotensive pregnant women (2185 ng/mg) [14]	NA	NA	[14]
N-acetyltransferase	N-acetyltransferase 1 (NAT1)	Liver [20, 21]	NA	NA	NA	NA	NA	NA	NA	NA	NA	NA	NA	NA	[20, 21]
N-acetyltransferase	N-acetyltransferase 2 (NAT2)	Liver [20, 22, 23]	Decrease	Hepatic NAT2 activity in gestational week 8-16 (0.574 calculated metabolic ratio) was observed to be significantly lower than hepatic NAT2 activity at 4-6 weeks postdelivery (0.658 calculated metabolic ratio) [23]	Increase to baseline, then no change	There was no significant difference between estimated hepatic NAT2 activity in gestational week 20-28 and gestational week 32-39 [22, 23]	No change	No significant differences in hydralazine apparent oral clearance, apparent volume of distribution, or metabolite-to-parent drug AUC ratio were observed in gestational week 22-26 compared to gestational week 30-38 [22]	No change	Hepatic NAT2 activity at 4-6 weeks postpartum did not differ significantly from that in the second or third trimesters [23]	NA	NA	NA	NA	[20, 22, 23]
Sulfotransferase	Sulfotransferase 1E1 (SULT1E1)	NA	NA	NA	NA	NA	NA	NA	NA	NA	NA	NA	NA	NA	NA
UDP-glucuronosyltransferase 1	UDP-glucuronosyltransferase 1A1 (UGT1A1)	Liver [26]	Increase?	Considering buprenorphine metabolism by UGT1A1, UGT1A3, and UGT2B7, the mean AUC ratio of buprenorphine glucuronide metabolite to buprenorphine parent drug was significantly increased in trimester 1/2 (0.71) compared to 4 weeks postdelivery (0.30) [26]	Increase?	Considering buprenorphine metabolism by UGT1A1, UGT1A3, and UGT2B7, the mean AUC ratio of buprenorphine glucuronide metabolite to buprenorphine parent drug was significantly increased in trimester 1/2 (0.71) compared to 4 weeks postdelivery (0.30) [26]	Increase?	Considering buprenorphine metabolism by UGT1A1, UGT1A3, and UGT2B7, the mean AUC ratio of buprenorphine glucuronide metabolite to buprenorphine parent drug was significantly increased in trimester 3 (2.07) compared to 4 weeks postdelivery (0.30) [26]	Decrease to baseline?	Considering buprenorphine metabolism by UGT1A1, UGT1A3, and UGT2B7, the mean AUC ratio of buprenorphine glucuronide metabolite to buprenorphine parent drug demonstrated a decreasing trend from the first trimester to 4 weeks postdelivery [26]	NA	NA	NA	NA	[26]
UDP-glucuronosyltransferase 1	UDP-glucuronosyltransferase 1A3 (UGT1A3)	Liver [26]	Increase?	Considering buprenorphine metabolism by UGT1A1, UGT1A3, and UGT2B7, the mean AUC ratio of buprenorphine glucuronide metabolite to buprenorphine parent drug was significantly increased in trimester 1/2 (0.71) compared to 4 weeks postdelivery (0.30) [26]	Increase?	Considering buprenorphine metabolism by UGT1A1, UGT1A3, and UGT2B7, the mean AUC ratio of buprenorphine glucuronide metabolite to buprenorphine parent drug was significantly increased in trimester 1/2 (0.71) compared to 4 weeks postdelivery (0.30) [26]	Increase?	Considering buprenorphine metabolism by UGT1A1, UGT1A3, and UGT2B7, the mean AUC ratio of buprenorphine glucuronide metabolite to buprenorphine parent drug was significantly increased in trimester 3 (2.07) compared to 4 weeks postdelivery (0.30) [26]	Decrease to baseline?	Considering buprenorphine metabolism by UGT1A1, UGT1A3, and UGT2B7, the mean AUC ratio of buprenorphine glucuronide metabolite to buprenorphine parent drug demonstrated a decreasing trend from the first trimester to 4 weeks postdelivery [26]	NA	NA	NA	NA	[26]
UDP-glucuronosyltransferase 1	UDP-glucuronosyltransferase 1A4 (UGT1A4)	Liver [27, 28]	NA	NA	NA	NA	NA	NA	NA	NA	NA	NA	17β-estradiol, upregulation (mRNA)	In ERα-negative HepG2 cells transfected with an ERα-expressing plasmid, a significant 2.3-fold increase in UGT1A4 mRNA expression was observed upon exposure to the physiological levels of 17β-estradiol seen in pregnancy [28]	[27, 28]
UDP-glucuronosyltransferase 2	UDP-glucuronosyltransferase 2B4 (UGT2B4)	NA	NA	NA	NA	NA	NA	NA	NA	NA	NA	NA	NA	NA	NA
UDP-glucuronosyltransferase 2	UDP-glucuronosyltransferase 2B7 (UGT2B7)	Liver [26]	Increase?	Considering buprenorphine metabolism by UGT1A1, UGT1A3, and UGT2B7, the mean AUC ratio of buprenorphine glucuronide metabolite to buprenorphine parent drug was significantly increased in trimester 1/2 (0.71) compared to 4 weeks postdelivery (0.30) [26]	Increase?	Considering buprenorphine metabolism by UGT1A1, UGT1A3, and UGT2B7, the mean AUC ratio of buprenorphine glucuronide metabolite to buprenorphine parent drug was significantly increased in trimester 1/2 (0.71) compared to 4 weeks postdelivery (0.30) [26]	Increase?	Considering buprenorphine metabolism by UGT1A1, UGT1A3, and UGT2B7, the mean AUC ratio of buprenorphine glucuronide metabolite to buprenorphine parent drug was significantly increased in trimester 3 (2.07) compared to 4 weeks postdelivery (0.30) [26]	Decrease to baseline?	Considering buprenorphine metabolism by UGT1A1, UGT1A3, and UGT2B7, the mean AUC ratio of buprenorphine glucuronide metabolite to buprenorphine parent drug demonstrated a decreasing trend from the first trimester to 4 weeks postdelivery [26]	NA	NA	NA	NA	[26]
UDP-glucuronosyltransferase 2	UDP-glucuronosyltransferase 2B10 (UGT2B10)	NA	NA	NA	NA	NA	NA	NA	NA	NA	NA	NA	NA	NA	NA
UDP-glucuronosyltransferase 2	UDP-glucuronosyltransferase 2B11 (UGT2B11)	NA	NA	NA	NA	NA	NA	NA	NA	NA	NA	NA	NA	NA	NA
UDP-glucuronosyltransferase 2	UDP-glucuronosyltransferase 2B15 (UGT2B15)	NA	NA	NA	NA	NA	NA	NA	NA	NA	NA	NA	NA	NA	NA

## Sheet: Table S3
			Effect of Gestational Age on Placental Enzyme Activity/Expression								Effect of Pregnancy Complications on Placental Enzyme Activity/Expression		Effect of Hormones on Placental Enzyme Activity/Expression
Enzyme Family	Enzyme	Location	First Trimester (0-12 weeks)	Evidence of Effect	Second Trimester (13-28 weeks)	Evidence of Effect	Third Trimester (29-40 weeks) or Term	Evidence of Effect	Postpartum (~≥4 weeks postdelivery)	Evidence of Effect	Complication	Evidence of Effect	Endogenous Hormone	Evidence of Effect	Citation
Methyltransferase	Carboxyl-O-methyltransferase (CMT)	NA	Increase	Following homogenization and centrifugation of placental tissues, CMT specific activity was assayed and appeared to increase across gestational week 7-13 [1]	Increase to decrease	CMT specific activity appeared to increase until a maximum was achieved in gestational week 15-20, then trended towards a decrease [1]	Decrease	CMT specific activity appeared to decrease throughout the third trimester, achieving approximately half the maximum specific activity by term [1]	NA	NA	NA	NA	Human chorionic gonadotropin, substrate	Human chorionic gonadotropin demonstrated the highest substrate efficiency for placental CMT compared to all substrates studied: 228% enzyme activity was achieved [1]	[1]
Methyltransferase	Catechol-O-methyltransferase (COMT)	Syncytiotrophoblast [4]	NA	NA	NA	NA	Subject to interindividual variation	Up to 4-fold differences in cytosolic COMT activity were observed upon analysis of placentas at term, as measured by the rate of formation of methyl estrogens [2]	NA	NA	Preeclampsia, no change (protein)	No significant difference in placental COMT expression was observed between pregnant preeclamptic women in the third trimester and pregnant non-preeclamptic women at term; however, serum and urinary levels of 2-methoxyestradiol were increased in pregnant preeclamptic women [3] No significant difference in COMT expression was observed in placentas from preeclamptic women at term compared to placen…	17β-estradiol, substrate	The estrogen metabolites 2-hydroxyestradiol and 4-hydroxyestradiol, substrates of COMT, demonstrated O-methylation activity with range 48-197 pmol of methyl ether formed/mg protein/min and range 35-125 pmol of methyl ether formed/mg protein/min, respectively [2]	[2-4]
Glutathione S-transferase	Glutathione S-transferase α (GSTA)	NA	Decrease	Utilizing 3,4-dicholoro-1-nitrobenzene as an assay, a decrease in mean specific activity of GSTA was observed with increasing gestational age of human intrauterine conceptual tissues: substrate glutathione conjugation was 1.5-fold higher at gestational week 6 than gestational week 8 and 1.8-fold higher at gestational week 6 than gestational week 10 [5]	NA	NA	NA	NA	NA	NA	Preeclampsia, no change (protein)	No significant difference in median placental GSTA protein levels was observed in preeclamptic pregnant women compared to normotensive pregnant women [14]	NA	NA	[5, 14]
Glutathione S-transferase	Glutathione S-transferase μ (GST-μ)	NA	No change	Utilizing 1-chloro-2,4-dinitrobenzene as an assay, no change in mean specific activity of GST-μ was observed with increasing gestational age (i.e., gestational week 6 to gestational week 10) of human intrauterine conceptual tissues [5]	NA	NA	NA	NA	NA	NA	Preeclampsia, no change (protein)	No significant difference in median placental GST-μ protein levels was observed in preeclamptic pregnant women compared to normotensive pregnant women [14]	NA	NA	[5, 14]
Glutathione S-transferase	Glutathione S-transferase π (GST-π)	Amnion Chorionic villi [16-18]	No change	Utilizing ethacrynic acid as an assay, no change in mean specific activity of GST-π was observed with increasing gestational age (i.e., gestational week 6 to gestational week 10) of human intrauterine conceptual tissues [5]	NA	NA	NA	NA	NA	NA	Diabetes, decrease (activity)	Placental glutathione transferase activity was significantly lower in term placentas of women with overt diabetes compared to term placentas of women without diabetes [19]	Catecholamine, downregulation (activity)	Epinephrine was observed to inhibit amnionic and chorionic glutathione S-transferase activity by 46% and 52%, respectively; norepinephrine was observed to inhibit amnionic and chorionic glutathione S-transferase activity by 64% and 55%, respectively [18]	[5, 14, 16-19]
											Preeclampsia, decrease (protein)	Median placental GST-π protein levels were decreased in preeclamptic pregnant women (1543 ng/mg) compared to normotensive pregnant women (2169 ng/mg) [14]
N-acetyltransferase	N-acetyltransferase 1 (NAT1)	Chorionic villi [21]	NA	NA	NA	NA	Increase?	Compared to placental NAT1 activity measured at gestational week 11-25 in a separate study, the NAT1 activity was higher in the term placentas analyzed [20]	NA	NA	NA	NA	NA	NA	[20, 21]
N-acetyltransferase	N-acetyltransferase 2 (NAT2)	Chorionic villi [21]	NA	NA	NA	NA	NA	NA	NA	NA	NA	NA	NA	NA	[21]
Sulfotransferase	Sulfotransferase 1E1 (SULT1E1)	Chorionic villi [25]	NA	NA	NA	NA	NA	NA	NA	NA	NA	NA	17β-estradiol, substrate	17β-estradiol was suggested to be the preferred substrate for placental SULT1E1, as it demonstrated the highest rate of conversion to the sulfated metabolite compared to estrone, estriol, and dehydroepiandrosterone [25]	[25]
UDP-glucuronosyltransferase 1	UDP-glucuronosyltransferase 1A1 (UGT1A1)	NA	NA	NA	NA	NA	NA	NA	NA	NA	NA	NA	NA	NA	NA
UDP-glucuronosyltransferase 1	UDP-glucuronosyltransferase 1A3 (UGT1A3)	NA	NA	NA	NA	NA	NA	NA	NA	NA	NA	NA	NA	NA	NA
UDP-glucuronosyltransferase 1	UDP-glucuronosyltransferase 1A4 (UGT1A4)	NA	NA	NA	NA	NA	Present	The presence of UGT1A4 was detected by Western blot analysis of term placentas from pregnant women not using lamotrigine, as well as term placentas from pregnant women using lamotrigine [27]	NA	NA	NA	NA	NA	NA	[27]
UDP-glucuronosyltransferase 2	UDP-glucuronosyltransferase 2B4 (UGT2B4)	Syncytiotrophoblast [29]	NA	NA	NA	NA	Present	UGT2B4 mRNA and protein expression were identified in RT-PCR and Western blot analyses, respectively, of term placentas [29]	NA	NA	NA	NA	NA	NA	[29]
UDP-glucuronosyltransferase 2	UDP-glucuronosyltransferase 2B7 (UGT2B7)	Syncytiotrophoblast [29]	NA	NA	NA	NA	Subject to interindividual variation	The presence of UGT2B7 in term placentas was supported by positive results from RT-PCR and Western blot analyses, and Northern blot analysis of term placentas indicated a 10-fold variation in UGT2B7 mRNA expression [29]	NA	NA	NA	NA	NA	NA	[29]
UDP-glucuronosyltransferase 2	UDP-glucuronosyltransferase 2B10 (UGT2B10)	NA	NA	NA	NA	NA	Present	UGT2B10 mRNA expression was identified in RT-PCR analysis of all 12 term placentas studied [29]	NA	NA	NA	NA	NA	NA	[29]
UDP-glucuronosyltransferase 2	UDP-glucuronosyltransferase 2B11 (UGT2B11)	NA	NA	NA	NA	NA	Present	UGT2B11 mRNA expression was identified in RT-PCR analysis of all 12 term placentas studied [29]	NA	NA	NA	NA	NA	NA	[29]
UDP-glucuronosyltransferase 2	UDP-glucuronosyltransferase 2B15 (UGT2B15)	NA	NA	NA	NA	NA	Present	UGT2B15 mRNA expression was identified in RT-PCR analysis of all 12 term placentas studied [29]	NA	NA	NA	NA	NA	NA	[29]

## Sheet: Table S4
			Effect of Gestational Age on Maternal Transporter Activity/Expression								Effect of Pregnancy Complications on Maternal Transporter Activity/Expression		Effect of Hormones on Maternal Transporter Activity/Expression
Transporter Family	Transporter	Location	First Trimester (0-12 weeks)	Evidence of Effect	Second Trimester (13-28 weeks)	Evidence of Effect	Third Trimester (29-40 weeks) or Term	Evidence of Effect	Postpartum (~≥4 weeks postdelivery)	Evidence of Effect	Complication	Evidence of Effect	Endogenous Hormone	Evidence of Effect	Citation
ABCB (multidrug resistance)	P-glycoprotein (P-gp, MDR1, ABCB1)	Kidney [42] Small intestine [88]	NA	NA	NA	NA	Increase (renal)	Renal clearance of digoxin and renal secretion clearance of digoxin were increased by 61% and 120%, respectively, in women during the third trimester of pregnancy compared to the same women at 6-10 weeks postpartum [42]	NA	NA	HIV, no change (activity)	There was no significant difference in fexofenadine AUC, Cmax, tmax, CL/F, Vd/F or t1/2 parameters between postpartum women living with HIV and healthy nonpregnant women [88]	NA	NA	[42, 88]
							No change (intestinal)	Fexofenadine Cmax, AUC(0-infinity), and AUC(0-24) ratios comparing the third trimester to 4-6 weeks postpartum were within the equivalence window of 0.8-1.25, suggesting no difference in intestinal P-gp levels between the third trimester or postdelivery [88]
ABCB (multidrug resistance)	Multidrug resistance protein 3 (MDR3, ABCB4)	Liver [92, 93]	NA	NA	NA	NA	NA	NA	NA	NA	Intrahepatic cholestasis, no change (protein)	A liver biopsy sampled from a patient with early-onset intrahepatic cholestasis in gestational week 11 demonstrated normal expression of the MDR3 transporter; the patient was homozygous for SNP S320F in the MDR3 gene, though various genetic mutations have been identified and correlated with this condition [93]	NA	NA	[92, 93]
ABCB (multidrug resistance)	Bile salt export pump (BSEP, ABCB11)	Liver [92, 95]	NA	NA	NA	NA	NA	NA	NA	NA	Intrahepatic cholestasis, decrease (protein)	A liver biopsy sampled from a patient with early-onset intrahepatic cholestasis in gestational week 11 demonstrated weak canalicular staining of the BSEP transporter; the patient was homozygous for SNP V444A in the BSEP gene, though various genetic mutations have been identified and correlated with this condition [93]	17β-estradiol, downregulation (mRNA and protein)	In human primary hepatocytes, BSEP mRNA and protein expression were significantly and dose-dependently decreased by 17β-estradiol [95]	[92, 93, 95]
ABCC (multidrug resistance associated protein)	Multidrug resistance associated protein 1 (MRP1, ABCC1)	NA	NA	NA	NA	NA	NA	NA	NA	NA	NA	NA	NA	NA	NA
ABCC (multidrug resistance associated protein)	Multidrug resistance associated protein 2 (MRP2, ABCC2)	NA	NA	NA	NA	NA	NA	NA	NA	NA	NA	NA	NA	NA	NA
ABCC (multidrug resistance associated protein)	Multidrug resistance associated protein 3 (MRP3, ABCC3)	Liver [102]	NA	NA	NA	NA	NA	NA	NA	NA	NA	NA	17β-estradiol, upregulation (mRNA and protein)	In human hepatic LO2 cells, exposure to 500 nM of 17β-estradiol for 12 hours significantly increased MRP3 mRNA and protein expression [102]	[102]
ABCC (multidrug resistance associated protein)	Multidrug resistance associated protein 4 (MRP4, ABCC4)	Uterus [103]	NA	NA	NA	NA	NA	NA	NA	NA	NA	NA	NA	NA	[103]
ABCC (multidrug resistance associated protein)	Multidrug resistance associated protein 5 (MRP5, ABCC5)	NA	NA	NA	NA	NA	NA	NA	NA	NA	NA	NA	NA	NA	NA
ABCC (multidrug resistance associated protein)	Multidrug resistance associated protein 7 (MRP7, ABCC10)	NA	NA	NA	NA	NA	NA	NA	NA	NA	NA	NA	NA	NA	NA
ABCC (multidrug resistance associated protein)	Multidrug resistance associated protein 8 (MRP8, ABCC11)	NA	NA	NA	NA	NA	NA	NA	NA	NA	NA	NA	NA	NA	NA
ABCG (multidrug resistance)	Breast cancer resistance protein (BCRP, ABCG2)	Liver [88]	NA	NA	NA	NA	Decrease?	Considering rosuvastatin transport by BCRP, OATP1B1, and OATP1B3, AUC(0-last) measured in pregnant women with HIV was approximately 40% higher in the third trimester compared to at term [88]	Increase to baseline	Rosuvastatin Cmax, AUC(0-infinity), and AUC(0-24) ratios comparing the third trimester to 4-6 weeks postpartum were greater than one, suggesting that OATP1B1, OATP1B3, and/or BCRP levels were inhibited in the third trimester but, postdelivery, returned to baseline [88]	HIV, no change (activity)	No significant difference in rosuvastatin AUC, Cmax, tmax, CL/F, Vd/F or t1/2 parameters was observed between postpartum women living with HIV and healthy nonpregnant women [88]	NA	NA	[88]
SLC10A	Sodium-taurocholate cotransporting polypeptide (NTCP, SLC10A1)	NA	NA	NA	NA	NA	NA	NA	NA	NA	NA	NA	NA	NA	NA
SLC16A	Monocarboxylate transporter 3 (MCT3, SLC16A3)	NA	NA	NA	NA	NA	NA	NA	NA	NA	NA	NA	NA	NA	NA
SLC21A/SLCO (organic anion transporting polypeptide)	Organic anion transporting polypeptide 1A2 (OATP1A2, OATP-A, SLC21A3, SLCO1A2)	Liver [92]	NA	NA	NA	NA	NA	NA	NA	NA	NA	NA	NA	NA	[92]
SLC21A/SLCO (organic anion transporting polypeptide)	Organic anion transporting polypeptide 1B1 (OATP1B1, OATP-C, SLC21A6, SLCO1B1)	Liver [88, 92]	NA	NA	NA	NA	Decrease?	Considering rosuvastatin transport by BCRP, OATP1B1, and OATP1B3, AUC(0-last) measured in pregnant women with HIV was approximately 40% higher in the third trimester compared to at term [88]	Increase to baseline	Rosuvastatin Cmax, AUC(0-infinity), and AUC(0-24) ratios comparing the third trimester to 4-6 weeks postpartum were greater than one, suggesting that OATP1B1, OATP1B3, and/or BCRP levels were inhibited in the third trimester but, postdelivery, returned to baseline [88]	HIV, no change (activity)	No significant difference in rosuvastatin AUC, Cmax, tmax, CL/F, Vd/F or t1/2 parameters was observed between postpartum women living with HIV and healthy nonpregnant women [88]	NA	NA	[88, 92]
SLC21A/SLCO (organic anion transporting polypeptide)	Organic anion transporting polypeptide 1B3 (OATP1B3, OATP-8, SLC21A8, SLCO1B3)	Liver [88]	NA	NA	NA	NA	Decrease?	Considering rosuvastatin transport by BCRP, OATP1B1, and OATP1B3, AUC(0-last) measured in pregnant women with HIV was approximately 40% higher in the third trimester compared to at term [88]	Increase to baseline	Rosuvastatin Cmax, AUC(0-infinity), and AUC(0-24) ratios comparing the third trimester to 4-6 weeks postpartum were greater than one, suggesting that OATP1B1, OATP1B3, and/or BCRP levels were inhibited in the third trimester but, postdelivery, returned to baseline [88]	HIV, no change (activity)	No significant difference in rosuvastatin AUC, Cmax, tmax, CL/F, Vd/F or t1/2 parameters was observed between postpartum women living with HIV and healthy nonpregnant women [88]	NA	NA	[88]
SLC21A/SLCO (organic anion transporting polypeptide)	Organic anion transporting polypeptide 2A1 (OATP2A1, PGT, SLCO2A1)	NA	NA	NA	NA	NA	NA	NA	NA	NA	NA	NA	NA	NA	NA
SLC21A/SLCO (organic anion transporting polypeptide)	Organic anion transporting polypeptide 2B1 (OATP2B1, OATP-B, SLC21A9, SLCO2B1)	NA	NA	NA	NA	NA	NA	NA	NA	NA	NA	NA	NA	NA	NA
SLC21A/SLCO (organic anion transporting polypeptide)	Organic anion transporting polypeptide 3A1 (OATP3A1, OATP-D, SLC21A11, SLCO3A1)	Liver [92]	NA	NA	NA	NA	NA	NA	NA	NA	NA	NA	NA	NA	[92]
SLC21A/SLCO (organic anion transporting polypeptide)	Organic anion transporting polypeptide 4A1 (OATP4A1, OATP-E, SLC21A12, SLCO4A1)	NA	NA	NA	NA	NA	NA	NA	NA	NA	NA	NA	NA	NA	NA
SLC22A: organic cation transporter subfamily	Organic cation transporter 1 (OCT1, SLC22A1)	NA	NA	NA	NA	NA	NA	NA	NA	NA	NA	NA	NA	NA	NA
SLC22A: organic cation transporter subfamily	Organic cation transporter 2 (OCT2, SLC22A2)	Kidney [113]	NA	NA	Increase?	Considering metformin transport by OCT2, MATE1, and MATE2, mean metformin secretion clearance increased from 354 mL/min in gestational week 10-14 to 538 mL/min in gestational week 22-26; similarly, mean N1-methylnicotinamide secretion clearance increased from 42 mL/min in the first trimester to 269 mL/min in the second trimester [113]	Inconclusive	Compared with mean metformin secretion clearance ≥12 weeks postpartum (304 mL/min), mean secretion clearance in gestational week 22-26 was 77% higher and mean secretion clearance in gestational week 34-38 was 44% higher, demonstrating decreased clearance and transporter activity between the second and third trimesters [113] However, mean N1-methylnicotinamide secretion clearance was 3.5-fold high…	Decrease	Considering metformin transport by OCT2, MATE1, and MATE2, mean secretion clearance in gestational week 34-38 was 44% higher than mean metformin secretion clearance ≥12 weeks postpartum (304 mL/min); similarly, mean N1-methylnicotinamide secretion clearance was 4.5-fold higher in the third trimester compared to postpartum (76 mL/min) [113]	NA	NA	NA	NA	[113]
SLC22A: organic cation transporter subfamily	Organic cation transporter 3 (OCT3, SLC22A3)	NA	NA	NA	NA	NA	NA	NA	NA	NA	NA	NA	NA	NA	NA
SLC22A family: organic cation/carnitine transporter subfamily	Organic cation/carnitine transporter 1 (OCTN1, SLC22A4)	NA	NA	NA	NA	NA	NA	NA	NA	NA	NA	NA	NA	NA	NA
SLC22A family: organic cation/carnitine transporter subfamily	Organic cation/carnitine transporter 2 (OCTN2, SLC22A5)	NA	NA	NA	NA	NA	NA	NA	NA	NA	NA	NA	NA	NA	NA
SLC22A family: organic anion transporter subfamily	Organic anion transporter 1 (OAT1, SLC22A6)	Kidney [122]	NA	NA	Increase	OAT1 activity, as estimated by OAT-mediated intrinsic clearance of tenofovir, was 2.9-fold higher in gestational week 13-28 compared to ≥6 weeks postpartum [122]	Decrease	The OAT1-mediated intrinsic clearance of tenofovir was 1.0-fold higher in gestational week 29-40 compared to ≥6 weeks postpartum, and this fold-change in OAT1 activity was less than that observed between the second trimester and postpartum [122]	NA	NA	NA	NA	NA	NA	[122]
SLC22A family: organic anion transporter subfamily	Organic anion transporter 2 (OAT2, SLC22A7)	Kidney [122] Liver [123]	NA	NA	NA	NA	NA	NA	Decrease	OAT2 activity, as estimated by OAT-mediated intrinsic clearance of acyclovir, was 3.1-fold higher in gestational week 29-40 compared to ≥6 weeks postpartum [122]	NA	NA	17β-estradiol, downregulation (activity)	A significant reduction in entecavir uptake was observed in OAT2-transfected MDCK cells upon addition of 1-100 μM 17β-estradiol to cell culture [123]	[122, 123]
													Progesterone, downregulation (activity)	A significant reduction in entecavir uptake was observed in OAT2-transfected MDCK cells upon addition of 10-100 μM progesterone to cell culture [123]
SLC22A family: organic anion transporter subfamily	Organic anion transporter 3 (OAT3, SLC22A8)	Kidney [122]	Highest	OAT3 activity, as estimated by OAT-mediated intrinsic clearance of oseltamivir carboxylate, was 2.2-fold higher in gestational week 1-12 compared to ≥6 weeks postpartum [122]	Decrease	The OAT3-mediated intrinsic clearance of oseltamivir was 1.7-fold higher in gestational week 13-28 compared to ≥6 weeks postpartum, and this fold-change in OAT3 activity was less than that observed between the first trimester and postpartum [122]	Decrease	The OAT3-mediated intrinsic clearance of oseltamivir was 1.3-fold higher in gestational week 29-40 compared to ≥6 weeks postpartum, and this fold-change in OAT3 activity was less than that observed between the second trimester and postpartum [122]	Decrease	OAT3 activity, as estimated by OAT-mediated intrinsic clearance of oseltamivir carboxylate, was 1.3-fold higher in gestational week 29-40 compared to ≥6 weeks postpartum [122]	NA	NA	NA	NA	[122]
SLC22A family: organic anion transporter subfamily	Organic anion transporter 4 (OAT4, SLC22A11)	Kidney [125]	NA	NA	NA	NA	NA	NA	NA	NA	NA	NA	NA	NA	[125]
SLC28A family (concentrative nucleoside transporter)	Concentrative nucleoside transporter 1 (CNT1, SLC28A1)	Kidney [129] Liver [129] Small intestine [129]	NA	NA	NA	NA	NA	NA	NA	NA	NA	NA	NA	NA	[129]
SLC28A family (concentrative nucleoside transporter)	Concentrative nucleoside transporter 2 (CNT2, SLC28A2)	Kidney [129] Liver [129] Small intestine [129]	NA	NA	NA	NA	NA	NA	NA	NA	NA	NA	NA	NA	[129]
SLC28A family (concentrative nucleoside transporter)	Concentrative nucleoside transporter 3 (CNT3, SLC28A3)	NA	NA	NA	NA	NA	NA	NA	NA	NA	NA	NA	NA	NA	NA
SLC29A family (equilibrative nucleoside transporter)	Equilibrative nucleoside transporter 1 (ENT1, SLC29A1)	Kidney [129] Liver [129] Small intestine [129]	NA	NA	NA	NA	NA	NA	NA	NA	NA	NA	17β-estradiol, downregulation (activity)	A significant reduction in entecavir uptake was observed in ENT1-transfected HEK293 cells upon addition of 5-100 μM 17β-estradiol to cell culture [123]	[123, 129]
													Progesterone, downregulation (activity)	A significant reduction in entecavir uptake was observed in ENT1-transfected HEK293 cells upon addition of 50-100 μM progesterone to cell culture [123]
SLC29A family (equilibrative nucleoside transporter)	Equilibrative nucleoside transporter 2 (ENT2, SLC29A2)	Kidney [129] Liver [129] Small intestine [129]	NA	NA	NA	NA	NA	NA	NA	NA	NA	NA	NA	NA	NA
SLC29A family (equilibrative nucleoside transporter)	Equilibrative nucleoside transporter 4 (ENT4, SLC29A4)	NA	NA	NA	NA	NA	NA	NA	NA	NA	NA	NA	NA	NA	NA
SLC47A family (multidrug and toxin extrusion)	Multidrug and toxin extrusion 1 (MATE1, SLC47A1)	Kidney [113]	NA	NA	Increase?	Considering metformin transport by OCT2, MATE1, and MATE2, mean metformin secretion clearance increased from 354 mL/min in gestational week 10-14 to 538 mL/min in gestational week 22-26; similarly, mean N1-methylnicotinamide secretion clearance increased from 42 mL/min in the first trimester to 269 mL/min in the second trimester [113]	Inconclusive	Compared with mean metformin secretion clearance ≥12 weeks postpartum (304 mL/min), mean secretion clearance in gestational week 22-26 was 77% higher and mean secretion clearance in gestational week 34-38 was 44% higher, demonstrating decreased clearance and transporter activity between the second and third trimesters [113] However, mean N1-methylnicotinamide secretion clearance was 3.5-fold high…	Decrease	Considering metformin transport by OCT2, MATE1, and MATE2, mean secretion clearance in gestational week 34-38 was 44% higher than mean metformin secretion clearance ≥12 weeks postpartum (304 mL/min); similarly, mean N1-methylnicotinamide secretion clearance was 4.5-fold higher in the third trimester compared to postpartum (76 mL/min) [113]	NA	NA	NA	NA	[113]
SLC47A family (multidrug and toxin extrusion)	Multidrug and toxin extrusion 2 (MATE2, SLC47A2)	Kidney [113]	NA	NA	Increase?	Considering metformin transport by OCT2, MATE1, and MATE2, mean metformin secretion clearance increased from 354 mL/min in gestational week 10-14 to 538 mL/min in gestational week 22-26; similarly, mean N1-methylnicotinamide secretion clearance increased from 42 mL/min in the first trimester to 269 mL/min in the second trimester [113]	Inconclusive	Compared with mean metformin secretion clearance ≥12 weeks postpartum (304 mL/min), mean secretion clearance in gestational week 22-26 was 77% higher and mean secretion clearance in gestational week 34-38 was 44% higher, demonstrating decreased clearance and transporter activity between the second and third trimesters [113] However, mean N1-methylnicotinamide secretion clearance was 3.5-fold high…	Decrease	Considering metformin transport by OCT2, MATE1, and MATE2, mean secretion clearance in gestational week 34-38 was 44% higher than mean metformin secretion clearance ≥12 weeks postpartum (304 mL/min); similarly, mean N1-methylnicotinamide secretion clearance was 4.5-fold higher in the third trimester compared to postpartum (76 mL/min) [113]	NA	NA	NA	NA	[113]
Immunoglobulin transporter	Neonatal Fc receptor (FcRn)	NA	NA	NA	NA	NA	NA	NA	NA	NA	NA	NA	NA	NA	NA

## Sheet: Table S5
				Effect of Gestational Age on Placental Transporter Activity/Expression								Effect of Pregnancy Complications on Placental Transporter Activity/Expression		Effect of Hormones on Placental Transporter Activity/Expression
Transporter Family	Transporter	Location	Direction of Transport	First Trimester (0-12 weeks)	Evidence of Effect	Second Trimester (13-28 weeks)	Evidence of Effect	Third Trimester (29-40 weeks) or Term	Evidence of Effect	Postpartum (~≥4 weeks postdelivery)	Evidence of Effect	Complication	Evidence of Effect	Endogenous Hormone	Evidence of Effect	Citation
ABCB (multidrug resistance)	P-glycoprotein (P-gp, MDR1, ABCB1)	Cytotrophoblast Syncytiotrophoblast (brush border membrane, maternal-facing membrane) [30, 33, 35, 37, 40, 41, 44, 51, 53, 55-60, 66, 105]	Fetal to maternal [49, 51]	Highest	RT-PCR analysis and Western blot analysis revealed significantly higher placental P-gp mRNA expression and protein expression, respectively, in gestational week 7-13 compared to at term [53] P-gp protein abundance in first semester placentas (mean gestational age: 9 weeks) was 69% higher than P-gp protein abundance in term placentas [54]	Decrease?	A progressive trend towards decreasing P-gp expression was observed in chorionic villus samples from women of gestational age 20-25 weeks, compared to samples from women of gestational age 13-14 weeks [52] While RT-PCR analysis revealed higher P-gp mRNA expression in placental tissue obtained in gestational week 24-35 compared to at term, no significant difference in mRNA expression was observed …	Decrease	Upon analysis of chorionic villus samples from women of gestational age 13-14 weeks and 38-41 weeks, a 2-fold decrease in P-gp expression between early pregnancy and late pregnancy samples was observed [52] P-gp protein abundance in second trimester placentas (mean gestational age: 16 weeks) was 52% higher than P-gp protein abundance in term placentas [54] Immunohistochemical analysis of preterm …	NA	NA	Chorioamnionitis, increase (protein)	Analysis of P-gp protein expression in syncytiotrophoblasts suggested higher immunolabeling in preterm pregnancy samples affected by chorioamnionitis compared to term pregnancy samples unaffected by chorioamnionitis [105]	17β-estradiol, upregulation (mRNA, protein, and activity)	Following 8 hours of incubation with 10E-7 M 17β-estradiol, a concentration that can be achieved during pregnancy, JAR placental cells demonstrated a 2-fold increase in P-gp mRNA expression and an approximate 6-fold increase in P-gp protein expression [63] Compared to control cells, P-gp mRNA expression and protein expression increased by approximately 50% and 60%, respectively, in cytotrophoblas…	[30, 33, 35, 37, 40, 41, 44, 49, 51-61, 63-67, 105, 136]
												Gestational diabetes, increase (mRNA) and no change (protein)	A significant increase in P-gp mRNA expression was observed in placentas from pregnant women with gestational diabetes compared to placentas from healthy pregnancies; this observation did not extend to P-gp protein expression, suggesting no change in transporter expression when hyperglycemia is managed [67]	Progesterone, no change (mRNA); upregulation (protein); and downregulation (activity)	Following 24 hours of incubation with 10E-7 M progesterone, a concentration that can be achieved during pregnancy, JAR placental cells demonstrated a 3.4-fold increase in P-gp protein expression; no increase in P-gp mRNA expression was observed [63] Though progesterone was not observed to affect P-gp mRNA expression, P-gp protein expression was observed to increase by approximately 40% in isolate…
												HCV, increase (mRNA and protein)	P-gp mRNA expression was 2.5-fold higher, and P-gp protein expression was 3.1-fold higher, in placentas from HCV(+) compared to placentas from HCV(-) women [136]	Cortisol, upregulation (mRNA) and no change (protein)	Cortisol, at a concentration of 10E-6 M, increased P-gp mRNA expression at 48 hours following administration to first trimester placental explants; however, no change in P-gp protein expression was observed [61]
												HIV, increase (mRNA and protein)	A 5.5-fold increase in P-gp mRNA expression was observed in term placentas from HIV(+) women compared to HIV(-) women, and the upregulation of P-gp protein expression demonstrated a similar trend; pharmacologic treatment with protease inhibitors increased P-gp mRNA expression by up to 2.5-fold [65]
												Preeclampsia, decrease (protein)	Upon immunohistochemical analysis of first and second trimester placentas from preeclamptic pregnancies, P-gp protein expression was decreased compared to expression in placentas from healthy pregnancies [66]
ABCB (multidrug resistance)	Multidrug resistance protein 3 (MDR3, ABCB4)	Cytotrophoblast Syncytiotrophoblast (basal membrane, fetal-facing membrane) [56]	Maternal to fetal? [56]	NA	NA	NA	NA	Inconclusive	Comparison of the normalized MDR3 gene expression of first trimester placentas (gestational age: 9-12 weeks) and third trimester placentas (gestational age: 38-40 weeks) revealed a significant 4-fold increase in expression at the higher gestational age [92] Conversely, MDR3 mRNA expression decreased significantly between the first trimester and term, as demonstrated by the 0.28 ratio of term expr…	NA	NA	NA	NA	17β-estradiol, upregulation (mRNA and protein)	As detected by RT-PCR analysis of placental trophoblasts, exposure to 100 nM 17β-estradiol for 12 hours increased MDR3 mRNA expression by more than 60% compared to control; similarly, exposure to 100 nM 17β-estradiol for 48 hours increased MDR3 protein expression by more than 60% above control [64]	[56, 64, 92]
ABCB (multidrug resistance)	Bile salt export pump (BSEP, ABCB11)	NA	Fetal to maternal? [94]	NA	NA	NA	NA	Decrease	Though BSEP gene expression was detected in first trimester placental samples, no BSEP gene expression was detected in third trimester placental samples [92] A significant decrease in BSEP mRNA expression from the first trimester to term was observed, as evidenced by the 0.16 ratio of term expression to first trimester expression [94]	NA	NA	NA	NA	NA	NA	[92, 94]
ABCC (multidrug resistance associated protein)	Multidrug resistance associated protein 1 (MRP1, ABCC1)	Cytotrophoblast Syncytiotrophoblast (basal membrane, fetal-facing membrane and brush border membrane, maternal-facing membrane) [30, 56, 57, 97]	Maternal to fetal [64]	NA	NA	NA	NA	NA	NA	NA	NA	HIV, decrease (mRNA)	MRP1 mRNA expression was significantly decreased in placentas from HIV(+) women compared to placentas from HIV(-) women [65]	17β-estradiol, substrate	In placentas from HIV(+) women, a significant positive correlation was observed between log-transformed placental MRP1 mRNA expression and maternal 17β-estradiol concentrations, suggesting that changes in MRP1 mRNA expression may impact transporter activity, as well as maternal and fetal steroid concentrations [65]	[30, 56, 57, 64, 65, 97]
														Progesterone, upregulation (mRNA) and no change (protein)	As detected by RT-PCR analysis of placental trophoblasts, exposure to 100 nM progesterone for 12 hours increased MRP1 mRNA expression by approximately 90% compared to control; no significant change in protein expression was observed [64]
ABCC (multidrug resistance associated protein)	Multidrug resistance associated protein 2 (MRP2, ABCC2)	Cytotrophoblast Syncytiotrophoblast (brush border membrane, maternal-facing membrane) [100]	Fetal to maternal [100]	NA	NA	Increase through second trimester	MRP2 mRNA expression was 4.4-fold higher in placentas at term compared to at gestational age 23-32 weeks [100]	Inconclusive	MRP2 mRNA expression was 1.8-fold higher in placentas at term compared to at gestational age 32-37 weeks; this fold-change was less than that observed between the second trimester and term, suggesting an increase in MRP2 mRNA expression [100] Conversely, MRP2 mRNA expression was observed to decrease significantly from the first trimester to term, as demonstrated by the 0.48 ratio of term expressi…	NA	NA	Gestational diabetes, no change (mRNA and protein)	No significant difference in MRP2 mRNA or protein expression was observed in placentas from pregnant women with gestational diabetes compared to placentas from healthy pregnancies [67]	NA	NA	[65, 67, 94, 100, 101]
												HIV, decrease (mRNA)	MRP2 mRNA expression was significantly decreased in placentas from HIV(+) women compared to placentas from HIV(-) women [65]
												Intrahepatic cholestasis, increase (mRNA)	Significantly higher MRP2 mRNA expression was observed in placentas from women with intrahepatic cholestasis compared to placentas from women without intrahepatic cholestasis [101]
ABCC (multidrug resistance associated protein)	Multidrug resistance associated protein 3 (MRP3, ABCC3)	Syncytiotrophoblast (brush border membrane, maternal-facing membrane) [72]	Fetal to maternal [72]	NA	NA	NA	NA	Increase	A significant increase in MRP3 mRNA expression from the first trimester to term was observed, as evidenced by the 4.13 ratio of term expression to first trimester expression [94]	NA	NA	NA	NA	NA	NA	[72, 94]
ABCC (multidrug resistance associated protein)	Multidrug resistance associated protein 4 (MRP4, ABCC4)	Syncytiotrophoblast (brush border membrane, maternal-facing membrane) [65]	Fetal to maternal [65]	NA	NA	NA	NA	NA	NA	NA	NA	HIV, decrease (mRNA)	MRP4 mRNA expression was significantly decreased in placentas from HIV(+) women compared to placentas from HIV(-) women [65]	NA	NA	[65]
ABCC (multidrug resistance associated protein)	Multidrug resistance associated protein 5 (MRP5, ABCC5)	Cytotrophoblast Syncytiotrophoblast (basal membrane, fetal-facing membrane and brush border membrane, maternal-facing membrane) [104]	Fetal to maternal [104]	NA	NA	Decrease through second trimester	Compared to MRP5 mRNA expression at gestational age 23-32 weeks, mRNA expression was significantly lower in placentas at gestational age 32-37 weeks [104]	Decrease	Compared to MRP5 mRNA expression at gestational age 23-32 weeks, mRNA expression was 6-fold lower in placentas at term [104]	NA	NA	NA	NA	NA	NA	[104]
ABCC (multidrug resistance associated protein)	Multidrug resistance associated protein 7 (MRP7, ABCC10)	NA	NA	NA	NA	NA	NA	NA	NA	NA	NA	NA	NA	NA	NA	NA
ABCC (multidrug resistance associated protein)	Multidrug resistance associated protein 8 (MRP8, ABCC11)	NA	NA	NA	NA	NA	NA	NA	NA	NA	NA	NA	NA	NA	NA	NA
ABCG (multidrug resistance)	Breast cancer resistance protein (BCRP, ABCG2)	Cytotrophoblast Syncytiotrophoblast (brush border membrane, maternal-facing membrane) [33, 56, 61, 69, 70, 77, 80, 91, 105]	Fetal to maternal [70]	No change	RT-PCR analysis of placental tissues from gestational week 6-13, 16-19, 24-29, 32-35, and 38-41 indicated no significant change in BCRP mRNA expression throughout pregnancy [80]	No change	RT-PCR analysis of placental tissues from gestational week 6-13, 16-19, 24-29, 32-35, and 38-41 indicated no significant change in BCRP mRNA expression throughout pregnancy [80]	Inconclusive	Decreases in BCRP mRNA expression and protein expression were observed in normal placentas collected at term compared to normal placentas collected earlier in the third trimester [81] Immunoblotting analysis revealed BCRP protein expression to be significantly lower in term placentas compared to first trimester placentas [82] Though immunohistochemical analysis of preterm and term placentas revea…	NA	NA	Chorioamnionitis, decrease (mRNA and protein)	In placental samples from women with chorioamnionitis at mean gestational age of 29.3 weeks, BCRP mRNA expression was reduced by 48% and BCRP protein expression was reduced by 52%, both compared to control placental samples [81]	Estrone, substrate	Compared to nontransfected MDCKII cells, placental BCRP-transfected MDCKII cells exhibited higher apical-to-basal and basal-to-apical transport of estrone-3-sulfate; basal-to-apical transport increased by more than 11-fold in OATP2B1/BCRP double-transfected MDCKII cells compared to BCRP-transfected MDCKII cells [77]	[33, 56, 61, 64, 65, 67, 69, 70, 77, 80-82, 84-87, 89, 91, 105, 136]
												Gestational diabetes, no change (mRNA and protein)	No significant difference in BCRP mRNA or protein expression was observed in placentas from pregnant women with gestational diabetes compared to placentas from healthy pregnancies [67]	17β-estradiol, downregulation (mRNA, protein, and activity)	Placental BeWo cells incubated with 10E-7 M 17β-estradiol, an achievable concentration during pregnancy, exhibited a significant 75% decrease in BCRP protein expression following 72 hours of exposure; a 30% decrease in BCRP efflux activity was also observed [84] Though BCRP mRNA expression did not significantly change when first trimester placental explants were exposed to 17β-estradiol, a signif…
												HCV, no change (mRNA) and increase (protein)	Though there was no significant difference in BCRP mRNA expression between HCV(+) placentas and HCV(-) placentas, BCRP protein expression was increased by 2.3-fold in HCV(+) placentas [136]	Estriol, upregulation (mRNA and protein)	An approximate 2-fold increase in BCRP protein expression and 2.5-fold increase in BCRP mRNA expression were observed when BeWo cells were incubated with 10E-6 M estriol [85]
												HIV, decrease (mRNA) and increase (protein)	A significant decrease in BCRP mRNA expression was observed in term placentas from HIV(+) women compared to HIV(-) women; no significant change in BCRP protein expression was observed, though a trend towards increased protein expression was suggested [65]	Progesterone, upregulation (mRNA, protein, and activity)	Compared to control placental BeWo cells, BeWo cells incubated with 10E-5 M progesterone, an achievable concentration during pregnancy, exhibited a significant 2-fold increase in BCRP protein expression following 48 hours of exposure; a 122% increase in BCRP efflux activity was also observed [84] In BeWo cells, a 30% decrease was observed in BCRP transcriptional activity upon the inhibition of pr…
												Intrahepatic cholestasis, no change (mRNA and protein)	There was no significant difference in BCRP mRNA or protein expression between placental samples from women with and without intrahepatic cholestasis, though BCRP mRNA and protein expression were significantly upregulated with ursodeoxycholic acid treatment [91]	Prostaglandin E2, upregulation (mRNA, protein, and activity)	Following 24 hours of exposure to prostaglandin E2, BCRP mRNA expression increased by 1.5-fold and BCRP protein expression increased by 1.6-fold in human primary trophoblasts; a 16% decrease in cellular accumulation of fluorescent marker was observed upon treatment of human primary trophoblasts with prostaglandin E2 [87]
												Preeclampsia, decrease (mRNA and protein)	Compared to the expression observed in placentas from healthy pregnant women, BCRP mRNA and protein expression in placentas from preeclamptic pregnant women were significantly decreased by 40-60% and 45%, respectively [89]
SLC10A	Sodium-taurocholate cotransporting polypeptide (NTCP, SLC10A1)	NA	NA	NA	NA	NA	NA	NA	NA	NA	NA	NA	NA	NA	NA	NA
SLC16A	Monocarboxylate transporter 3 (MCT3, SLC16A3)	NA	NA	NA	NA	NA	NA	NA	NA	NA	NA	NA	NA	NA	NA	NA
SLC21A/SLCO (organic anion transporting polypeptide)	Organic anion transporting polypeptide 1A2 (OATP1A2, OATP-A, SLC21A3, SLCO1A2)	Syncytiotrophoblast (brush border membrane, maternal-facing membrane and vasculosyncytial membrane) [107, 108]	Bidirectional? [107, 108]	NA	NA	NA	NA	Decrease	OATP1A2 gene expression in third trimester placentas (gestational age: 38-40 weeks) was decreased by 8-fold compared to first trimester placentas (gestational age: 9-12 weeks) [92]	NA	NA	Intrahepatic cholestasis, decrease (mRNA and protein)	Significant decreases in OATP1A2 mRNA and protein expression were observed in placentas from women with intrahepatic cholestasis compared to placentas from women with uncomplicated pregnancies [108]	NA	NA	[92, 107, 108]
SLC21A/SLCO (organic anion transporting polypeptide)	Organic anion transporting polypeptide 1B1 (OATP1B1, OATP-C, SLC21A6, SLCO1B1)	NA	NA	NA	NA	NA	NA	NA	NA	NA	NA	NA	NA	NA	NA	NA
SLC21A/SLCO (organic anion transporting polypeptide)	Organic anion transporting polypeptide 1B3 (OATP1B3, OATP-8, SLC21A8, SLCO1B3)	Syncytiotrophoblast (vasculosyncytial membrane) [30, 108]	Bidirectional? [108]	NA	NA	NA	NA	NA	NA	NA	NA	Intrahepatic cholestasis, decrease (mRNA and protein)	Significant decreases in OATP1B3 mRNA and protein expression were observed in placentas from women with intrahepatic cholestasis compared to placentas from women with uncomplicated pregnancies [108]	NA	NA	[30, 108]
SLC21A/SLCO (organic anion transporting polypeptide)	Organic anion transporting polypeptide 2A1 (OATP2A1, PGT, SLCO2A1)	Syncytiotrophoblast (brush border membrane, maternal-facing membrane) [107]	Maternal to fetal [107]	NA	NA	NA	NA	NA	NA	NA	NA	NA	NA	NA	NA	[107]
SLC21A/SLCO (organic anion transporting polypeptide)	Organic anion transporting polypeptide 2B1 (OATP2B1, OATP-B, SLC21A9, SLCO2B1)	Syncytiotrophoblast (basal membrane, fetal-facing membrane) [77, 107, 109]	Bidirectional [77]	NA	NA	Decrease	A significant 32% decrease in OATP2B1 protein abundance was observed between first trimester placentas (gestational age: 1-98 days) and second trimester placentas (gestational age: 99-196 days) [54]	Inconclusive	A decrease in OATP2B1 mRNA expression was observed in term placentas (mean gestational age: 38.8 weeks) compared to preterm placentas (mean gestational age: 32.8 weeks), though significance of the results was not specified [81] Conversely, previous work demonstrated a 2.5-fold increase in OATP2B1 mRNA expression for term placentas, as compared to first trimester placentas [109]	NA	NA	Chorioamnionitis, decrease (mRNA and protein)	OATP2B1 mRNA expression in preterm placentas affected by chorioamnionitis demonstrated a significant 57% decrease when compared to placentas unaffected by chorioamnionitis; a decreasing, but not statistically significant, trend in OATP2B1 protein expression was observed in preterm placentas with chorioamnionitis compared to those without chorioamnionitis [81]	Estrone, substrate	The uptake of fluorescent organic anions, 8-FcAMP and fluorescein, was significantly inhibited upon introduction of estrone-3-sulfate to BeWo cell culture [109] While there was no significant difference in apical-to-basal or basal-to-apical transport of estrone-3-sulfate when comparing nontransfected MDCKII cells with placental OATP2B1-transfected MDCKII cells, basal-to-apical transport increased…	[38, 54, 65, 77, 81, 107, 109]
												HIV, decrease (mRNA)	OATP2B1 mRNA expression in HIV(+) placentas was significantly lower than mRNA expression in HIV(-) placentas [65]
SLC21A/SLCO (organic anion transporting polypeptide)	Organic anion transporting polypeptide 3A1 (OATP3A1, OATP-D, SLC21A11, SLCO3A1)	Syncytiotrophoblast (brush border membrane, maternal-facing membrane and basal membrane, fetal-facing membrane) [107]	NA	NA	NA	NA	NA	Decrease	A 17-fold decrease in OATP3A1 mRNA expression was observed in placentas of gestational age 38-40 weeks compared to placentas of gestational age 9-12 weeks [92]	NA	NA	NA	NA	NA	NA	[92, 107]
SLC21A/SLCO (organic anion transporting polypeptide)	Organic anion transporting polypeptide 4A1 (OATP4A1, OATP-E, SLC21A12, SLCO4A1)	Syncytiotrophoblast (brush border membrane, maternal-facing membrane and basal membrane, fetal-facing membrane) [65, 107]	NA	NA	NA	NA	NA	NA	NA	NA	NA	HIV, increase (mRNA)	A 2-fold increase in OATP4A1 mRNA expression was observed in placentas from HIV(+) women compared to placentas from HIV(-) women [65]	NA	NA	[65, 107]
SLC22A: organic cation transporter subfamily	Organic cation transporter 1 (OCT1, SLC22A1)	Low expression [111]	Bidirectional [111]	NA	NA	NA	NA	NA	NA	NA	NA	HIV, decrease (mRNA)	OCT1 mRNA expression in HIV(+) placentas was significantly lower (85-99%) than mRNA expression in HIV(-) placentas [65]	NA	NA	[65, 111]
SLC22A: organic cation transporter subfamily	Organic cation transporter 2 (OCT2, SLC22A2)	Low expression [111]	Bidirectional [111]	NA	NA	NA	NA	Decrease	OCT2 mRNA expression was significantly decreased in term placentas (mean gestational age: 38.9 weeks) compared to first trimester placentas (mean gestational age: 10.9 weeks) [114]	NA	NA	NA	NA	NA	NA	[111, 114]
SLC22A: organic cation transporter subfamily	Organic cation transporter 3 (OCT3, SLC22A3)	Syncytiotrophoblast (basal membrane, fetal-facing membrane) [115, 117]	Bidirectional [117]	NA	NA	Increase	A small, but insignificant, increase in OCT3 mRNA expression was observed in second trimester placentas compared to first trimester placentas; a significant 65% increase in OCT3 protein expression was observed when comparing second and first trimester placentas [116]	Inconclusive	Targeted proteonomics indicated a 2-fold increase in OCT3 protein abundance at term compared to during gestational day 1-98 [54] A significant 56% increase in OCT3 protein expression was observed in term placentas compared to first trimester placentas [116] Conversely, OCT3 mRNA expression was significantly decreased in term placentas (mean gestational age: 38.9 weeks) compared to first trimester…	NA	NA	HIV, decrease (mRNA and protein)	OCT3 mRNA expression and protein expression in HIV(+) placentas were significantly lower by 85-99% and 50%, respectively, as compared to expression in HIV(-) placentas [65]	NA	NA	[54, 65, 114-117]
SLC22A family: organic cation/carnitine transporter subfamily	Organic cation/carnitine transporter 1 (OCTN1, SLC22A4)	NA	NA	NA	NA	NA	NA	NA	NA	NA	NA	NA	NA	NA	NA	NA
SLC22A family: organic cation/carnitine transporter subfamily	Organic cation/carnitine transporter 2 (OCTN2, SLC22A5)	Cytotrophoblast Syncytiotrophoblast (brush border membrane, maternal-facing membrane) [118, 119]	Maternal to fetal [120]	NA	NA	NA	NA	Decrease	Though not considered to be significant, OCTN2 mRNA expression decreased by approximately 15% in term placentas compared to third trimester placentas (mean gestational age: 32.2 weeks) [119]	NA	NA	NA	NA	NA	NA	[118-120]
SLC22A family: organic anion transporter subfamily	Organic anion transporter 1 (OAT1, SLC22A6)	NA	NA	NA	NA	NA	NA	NA	NA	NA	NA	NA	NA	NA	NA	NA
SLC22A family: organic anion transporter subfamily	Organic anion transporter 2 (OAT2, SLC22A7)	NA	NA	NA	NA	NA	NA	NA	NA	NA	NA	NA	NA	NA	NA	NA
SLC22A family: organic anion transporter subfamily	Organic anion transporter 3 (OAT3, SLC22A8)	NA	NA	NA	NA	NA	NA	NA	NA	NA	NA	NA	NA	NA	NA	NA
SLC22A family: organic anion transporter subfamily	Organic anion transporter 4 (OAT4, SLC22A11)	Syncytiotrophoblast (basal membrane, fetal-facing membrane and brush border membrane, maternal-facing membrane) [107, 124]	Bidirectional [107]	NA	NA	NA	NA	Increase	Targeted proteomics indicated a 1.6-fold increase in OAT4 protein abundance at term compared to during gestational day 99-196 [54]	NA	NA	HIV, decrease (mRNA)	OAT4 mRNA expression in HIV(+) placentas was significantly lower than mRNA expression in HIV(-) placentas [65]	Estrone, substrate	Following the addition of 200 μM estrone-3-sulfate, tetracycline-inducible OAT4-expressing cells demonstrated complete inhibition of OAT4-mediated pravastatin uptake [107] Uptake of estrone-3-sulfate into OAT4-expressing Xenopus oocytes increased linearly throughout 2.5 hours of incubation [125]	[54, 65, 107, 124-126]
														17β-estradiol, no change (activity)	Upon treatment of OAT4-expressing BeWo cells with 17β-estradiol, there was no significant change observed regarding estrone sulfate uptake and, therefore, OAT4 function [126]
														Progesterone, downregulation (activity)	Compared to untreated cells, OAT4-expressing BeWo cells demonstrated a significant inhibition of estrone sulfate uptake when treated with 10E-5 M progesterone, which was attributed to decreased OAT4 expression at the cell surface; no significant change in estrone sulfate uptake was observed when OAT4-expressing BeWo cells were exposed to lower concentrations of progesterone (e.g., 10E-7, 10E-8) […
SLC28A family (concentrative nucleoside transporter)	Concentrative nucleoside transporter 1 (CNT1, SLC28A1)	No significant expression [129]	Maternal to fetal [68]	NA	NA	NA	NA	Increase	While CNT1 mRNA was not detected in first trimester placentas, minimal levels of CNT1 mRNA were detected in term placentas [128]	NA	NA	NA	NA	NA	NA	[68, 128, 129]
SLC28A family (concentrative nucleoside transporter)	Concentrative nucleoside transporter 2 (CNT2, SLC28A2)	No significant expression [129]	Maternal to fetal [68]	NA	NA	NA	NA	Increase	Median CNT2 mRNA expression significantly increased by 5-fold in term placentas compared to in first trimester placentas [128]	NA	NA	NA	NA	NA	NA	[68, 128, 129]
SLC28A family (concentrative nucleoside transporter)	Concentrative nucleoside transporter 3 (CNT3, SLC28A3)	NA	Maternal to fetal [68]	NA	NA	NA	NA	Increase	While CNT3 mRNA was not detected in first trimester placentas, a significant increase in CNT3 mRNA was observed in term placentas [128]	NA	NA	NA	NA	NA	NA	[68, 128]
SLC29A family (equilibrative nucleoside transporter)	Equilibrative nucleoside transporter 1 (ENT1, SLC29A1)	Syncytiotrophoblast (brush border membrane, maternal-facing membrane) [129]	Maternal to fetal [134]	NA	NA	NA	NA	No change	RT-PCR analysis revealed no significant difference in ENT1 mRNA expression between placentas of gestational week 9-13 and placentas of gestational week 38-41 [131]	NA	NA	Gestational diabetes, decrease (protein and activity)	A significant decrease in ENT1 protein abundance was observed in placentas from diabetic pregnancies compared to placentas from normal pregnancies; this observation was paralleled by a reduction in ENT1-mediated transport of adenosine [137]	NA	NA	[129, 131, 134-137]
												HCV, no change (mRNA and protein)	Neither ENT1 mRNA expression nor protein expression demonstrated significant differences between HCV(+) placentas and HCV(-) placentas [136]
												Preeclampsia, decrease (mRNA, protein, and activity)	Compared to values observed in placentas from normal pregnancies, ENT1 protein abundance and mRNA abundance in placentas from preeclamptic pregnancies were significantly decreased (78% and 63%, respectively); these observations were paralleled by the significant reduction in ENT1-mediated transport of adenosine [135]
SLC29A family (equilibrative nucleoside transporter)	Equilibrative nucleoside transporter 2 (ENT2, SLC29A2)	Syncytiotrophoblast (cytoplasm) [129]	Maternal to fetal [134]	NA	NA	NA	NA	No change	RT-PCR analysis revealed no significant difference in ENT2 mRNA expression between placentas of gestational week 9-13 and placentas of gestational week 38-41 [131]	NA	NA	Gestational diabetes, decrease (protein and activity)	A significant decrease in ENT2 protein abundance was observed in placentas from diabetic pregnancies compared to placentas from normal pregnancies; this observation was paralleled by a reduction in ENT2-mediated transport of adenosine [137]	Insulin, no change (mRNA and protein)	Insulin did not significantly change ENT2 protein expression or mRNA abundance, though the hormone was observed to reverse the reduction in ENT2-mediated adenosine transport associated with gestational diabetes [137]	[129, 131, 134-137]
												HCV, no change (mRNA and protein)	Neither ENT2 mRNA expression nor protein expression demonstrated significant differences between HCV(+) placentas and HCV(-) placentas [136]
												Preeclampsia, increase (mRNA, protein, and activity)	Compared to those observed in placentas from normal pregnancies, ENT2 protein abundance and mRNA abundance in placentas from preeclamptic pregnancies were significantly increased (5.2-fold and 4.8-fold, respectively); these observations were paralleled by the significant upregulation of ENT2-mediated transport of adenosine [135]
SLC29A family (equilibrative nucleoside transporter)	Equilibrative nucleoside transporter 4 (ENT4, SLC29A4)	NA	NA	NA	NA	NA	NA	NA	NA	NA	NA	NA	NA	NA	NA	NA
SLC47A family (multidrug and toxin extrusion)	Multidrug and toxin extrusion 1 (MATE1, SLC47A1)	NA	Fetal to maternal? [114]	NA	NA	NA	NA	Decrease	A statistically significant decrease in MATE1 mRNA expression was observed in human term placentas compared to first trimester placentas, which may suggest greater importance of the MATE1 protein at earlier gestational ages [114]	NA	NA	NA	NA	NA	NA	[114]
SLC47A family (multidrug and toxin extrusion)	Multidrug and toxin extrusion 2 (MATE2, SLC47A2)	NA	Fetal to maternal? [114]	NA	NA	NA	NA	Decrease	A decrease in MATE2 mRNA expression, though not statistically significant, was observed in human term placentas compared to first trimester placentas [114]	NA	NA	NA	NA	NA	NA	[114]
Immunoglobulin transporter	Neonatal Fc receptor (FcRn)	Syncytiotrophoblast (brush border membrane, maternal-facing membrane) [139, 140]	Maternal to fetal [139]	NA	NA	Increase?	Low mean fetal IgG concentrations increased to 3 g/L by gestational week 28, suggesting increased IgG transport capacity with increasing gestational age [142]	Increase?	Fetal-to-maternal IgG ratios were observed to increase through pregnancy and exceeded a ratio of 1 by gestational week 35, suggesting increased IgG transport capacity with increasing gestational age [142]	NA	NA	NA	NA	NA	NA	[139, 140, 142]
